# Supplementary material
Source: PubMed Central journal article supplement (PMC4119075)
Supplement: cbt-15-1077-s01.pdf [file cbt-15-1077-s01.pdf]

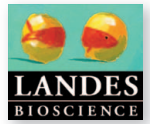

## **Supplemental Material to:**

**Kenichiro Doi, Qiang Liu, Krishne Gowda, Brian M Barth,  
David Claxton, Shantu Amin, Thomas P Loughran Jr,  
and Hong-Gang Wang**

**Maritoclax induces apoptosis in acute myeloid leukemia  
cells with elevated Mcl-1 expression**

**Cancer Biology & Therapy 2014; 15(8)  
<http://dx.doi.org/10.4161/cbt.29186>**

**<http://www.landesbioscience.com/journals/cbt/article/29186/>**

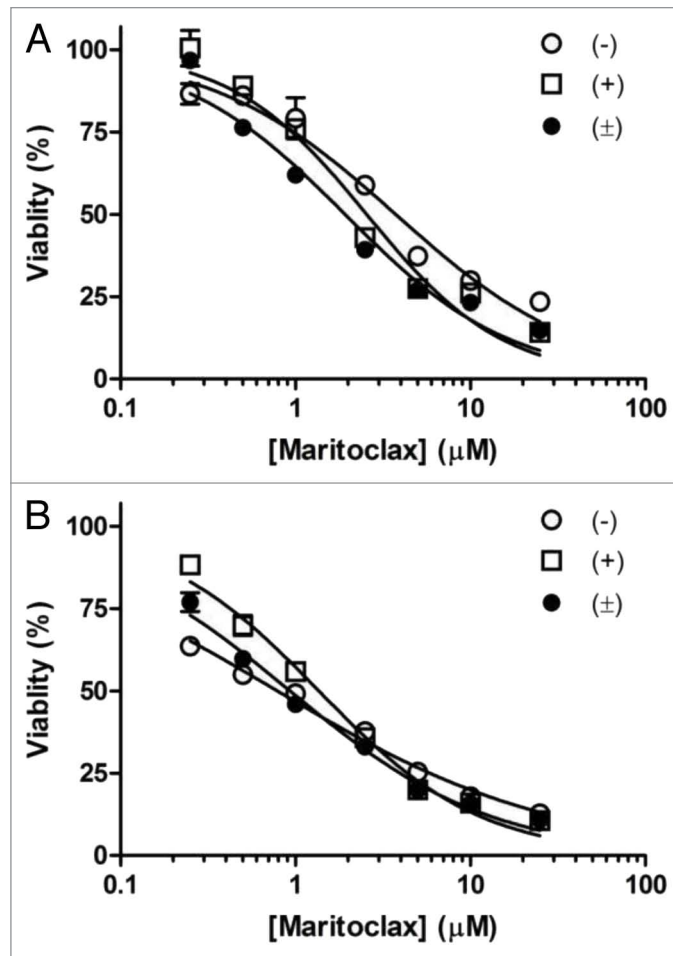

**Figure S1.** Potency of (+), (-), and racemic maritoclax in U937 (A) and Mcl-1-IRES-Bim K562 cells (B) in viability assays.

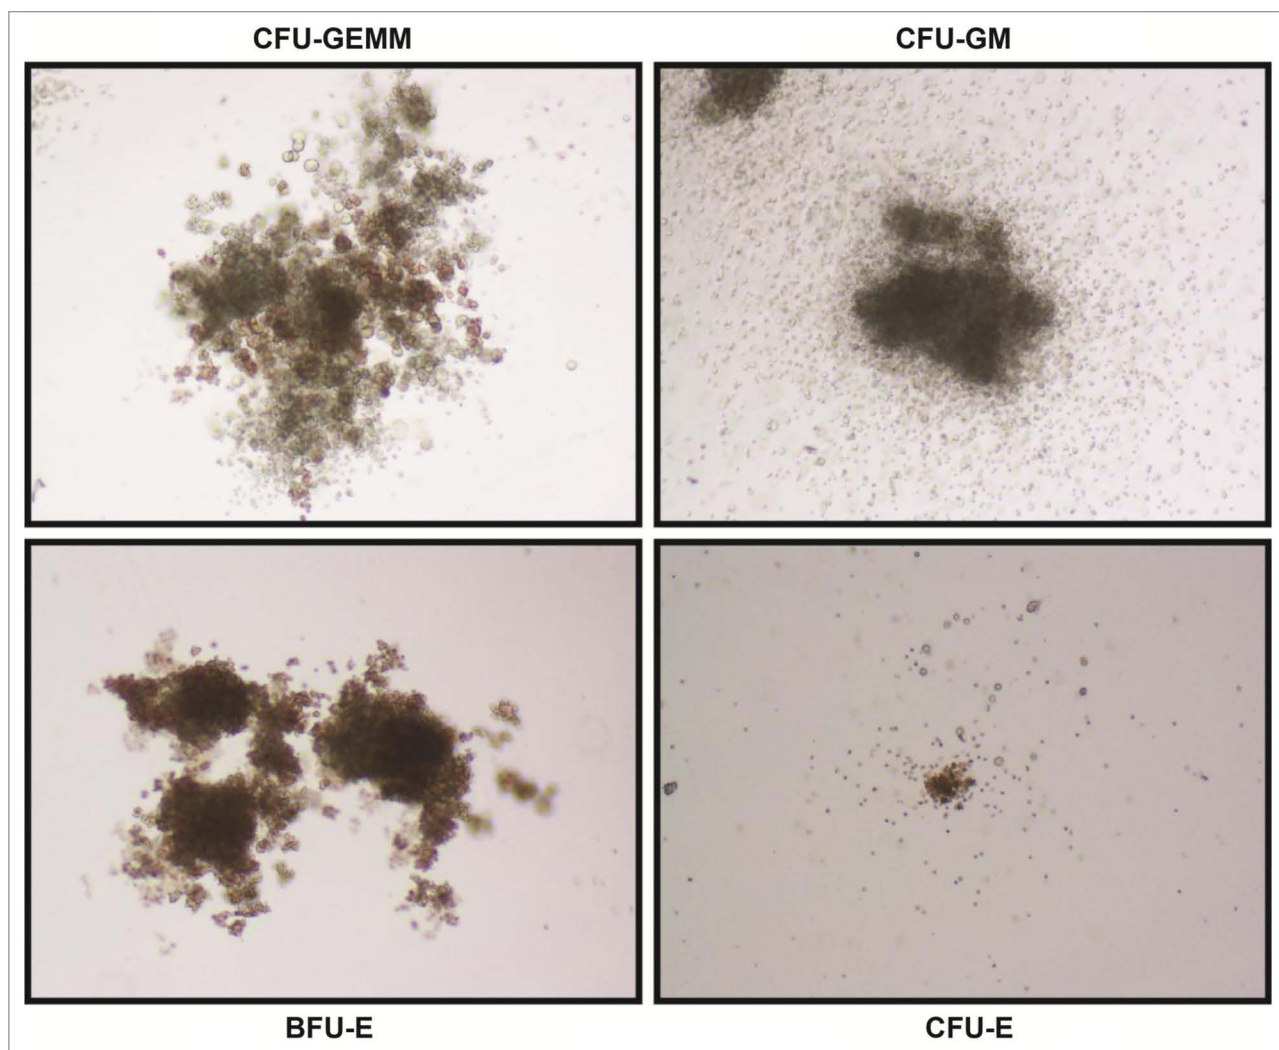

**Figure S2.** Representative colonies in vehicle-treated colony formation assay of primary mouse bone marrow, taken with the Olympus DP20 and the cellSens Standard software at 10× magnification.

**Table S1.** Primary human AML sample characteristics

| Patient Case # | WBC ( $\times 1000/\mu\text{L}$ ) | Blast (%) | NPM1 Mutation | FLT3-ITD Mutation | Cytogenetics    |
|----------------|-----------------------------------|-----------|---------------|-------------------|-----------------|
| 555            | 15.78                             | 70        | ND            | ND                | t(9;11)         |
| 559            | 66.6                              | 66        | -             | -                 | Complex         |
| 477            | 122.3                             | 78        | -             | -                 | del(15)(q13q15) |
| 574            | 107.7                             | 58        | +             | +                 | Normal          |

**Table S2.** The EC<sub>50</sub> of MEF, HEK293, and HeLa cells to maritoclax in viability assays

|        | EC <sub>50</sub> ( $\mu\text{M}$ ) |         |              |
|--------|------------------------------------|---------|--------------|
|        | Maritoclax                         | ABT-737 | Daunorubicin |
| MEF    | 18.1*                              | > 50*   | 1.75*        |
| HEK293 | > 50*                              | > 50*   | 41.2*        |
| HeLa   | > 50                               | 49.4    | 0.33         |

\*Cells were treated with the indicated compounds for 24 h.
